# Supplementary material for: Optimization of Micro-Electromechanical Lorentz Actuator Using a Surrogate Model Accelerated Genetic Algorithm
Source: MDPI journal article supplement (doi:10.3390/proceedings2024097191), 2024-04-17
Supplement: s1 [file s1]

**Supplemental material for:**

Buhr, P.; Shafai, C.; Park, B.; Wang, Y.; Belov, M. Optimization of Micro-Electromechanical Lorentz Actuator Using a Surrogate Model Accelerated Genetic Algorithm. *Proceedings* **2024**, *97*, 191. <https://doi.org/10.3390/proceedings2024097191>

| Design Variable               | Design (a) | Design (b) | Design (c) |
|-------------------------------|------------|------------|------------|
| # of spring turns             | 2          | 0          | 0          |
| Spring thickness              | 5          | 5          | 5          |
| Spring width                  | 29         | 188        | 232        |
| Spring length (long segment)  | 700        | 495        | 195        |
| Spring length (short segment) | 40         | N/A        | N/A        |
| Crossbar thickness            | 25         | 20         | 22         |
| Crossbar width                | 200        | 50         | 400        |
| Crossbar length               | 2080       | 1359       | 581        |
| Aluminum coating thickness    | 1.5        | 1.9        | 1.9        |
